# Supplementary material for: SiGra: single-cell spatial elucidation through an image-augmented graph transformer
Source: PubMed Central journal article supplement (PMC10497630; doi:10.1038/s41467-023-41437-w), 2023-09-12
Supplement: 41467_2023_41437_MOESM4_ESM.pdf [file 41467_2023_41437_MOESM4_ESM.pdf]

## **Description of Additional Supplementary Files**

### **Supplementary Data 1**

**Description:** DEGs identified for each layer based on raw data and enhanced data of slice 151676.

### **Supplementary Data 2**

**Description:** DEGs identified for each layer based on raw data and enhanced data of slice 151507.

### **Supplementary Data 3**

**Description:** Statistical analysis of layer-enriched genes based on enhanced gene expressions.
